Articles of interest in other COB journals

From *Journal of Cell Science*

**Compensatory signalling induced in the yolk sac vasculature by deletion of TGF $\beta$  receptors in mice**

Rita L. C. Carvalho, Fumiko Itoh, Marie-Jose Goumans, Franck Lebrin, Mitsuyasu Kato, Satoru Takahashi, Masatsugu Ema, Susumu Itoh, Marga van Rooijen, Philippe Bertolino, Peter ten Dijke and Christine L. Mummery

Carvalho, R. L. C. et al. 2007. *J. Cell Sci.* doi: 10.1242/jcs.013169

**CLASP localizes in two discrete patterns on cortical microtubules and is required for cell morphogenesis and cell division in *Arabidopsis***

Viktor Kirik, Ullrich Herrmann, Chaithanyarani Parupalli, John C. Sedbrook, David W. Ehrhardt and Martin Hülskamp

Kirik, V. et al. 2007. *J. Cell Sci.* doi: 10.1242/jcs.024950
